# Supplementary material
Source: MDPI journal article supplement (https://www.mdpi.com/2073-4441/13/10/1433)
Supplement: s1 [file s1]

## Article

# Afforestation of Degraded Croplands as a Water-Saving Option in Irrigated Region of the Aral Sea Basin

Navneet Kumar <sup>1</sup>, Asia Khamzina <sup>2,\*</sup>, Patrick Knöfel <sup>3</sup>, John P. A. Lamers <sup>1</sup> and Bernhard Tischbein <sup>1</sup>

<sup>1</sup> Center for Development Research (ZEF), University of Bonn, Genscherallee 3, 53113 Bonn, Germany; nkumar@uni-bonn.de (N.K.); jlamers@uni-bonn.de (J.P.A.L.); tischbein@uni-bonn.de (B.T.)

<sup>2</sup> Division of Environmental Science and Ecological Engineering, Korea University, 145 Anam-Ro, Seongbuk-Gu, Seoul 02841, Korea

<sup>3</sup> Department of Remote Sensing, University of Würzburg, Oswald-Külpe-Weg 86, 97074 Würzburg, Germany; patrick.knoefel@bkg.bund.de

\* Correspondence: asia\_khamzina@korea.ac.kr

## Supplementary Materials

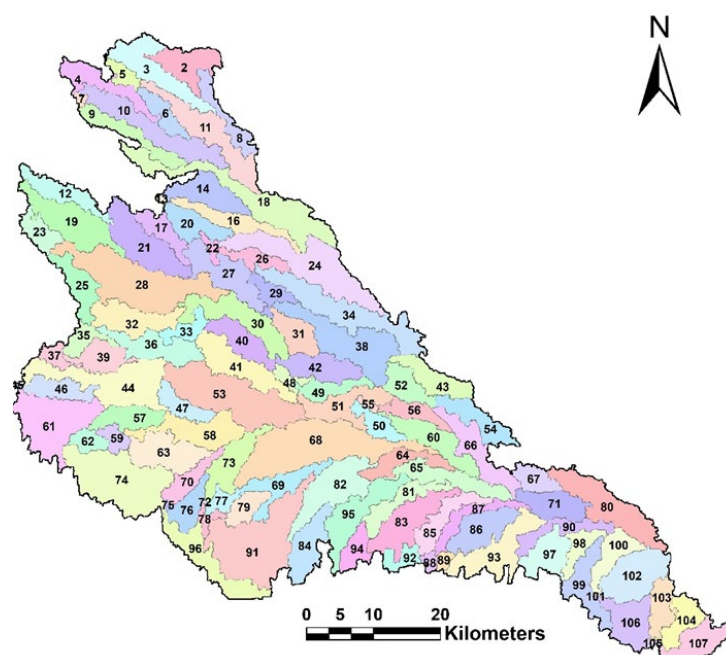

**Figure S1.** SWAT-delineated 107 sub-basins in the study region of Khorezm, Uzbekistan.

**Citation:** Kumar, N.; Khamzina, A.; Knöfel, P.; Lamers, John P.A.; Tischbein, B. Afforestation of Degraded Croplands as a Water-Saving Option in Irrigated Region of the Aral Sea Basin. *Water* **2021**, *13*, 1433. <https://doi.org/10.3390/w13101433>

Academic Editor: Pilar Montesinos

Received: 5 April 2021

Accepted: 18 May 2021

Published: 20 May 2021

**Publisher's Note:** MDPI stays neutral with regard to jurisdictional claims in published maps and institutional affiliations.

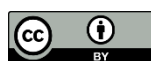

**Copyright:** © 2021 by the authors. Licensee MDPI, Basel, Switzerland. This article is an open access article distributed under the terms and conditions of the Creative Commons Attribution (CC BY) license (<http://creativecommons.org/licenses/by/4.0/>).

**Table S1.** Input data used in SWAT model for estimation of water balance components.

| Input Data                                                                                      | Type/Format/Spatial Resolution                                                          | Temporal Resolution and Duration                               | Data Source                                                                                                                                                                                                               |
|-------------------------------------------------------------------------------------------------|-----------------------------------------------------------------------------------------|----------------------------------------------------------------|---------------------------------------------------------------------------------------------------------------------------------------------------------------------------------------------------------------------------|
| SRTM Digital Elevation Model                                                                    | Raster map of 90 m resolution (Figure 3)                                                | Downloaded in 2015                                             | Consultative Group for International Agricultural Research (CGIAR) Consortium<br><a href="http://srtm.csi.cgiar.org/">http://srtm.csi.cgiar.org/</a>                                                                      |
| Weather data: precipitation, ambient temperature, wind speed, relative humidity, sunshine hours | Point data (Figure 4)                                                                   | Daily records for the period 2000–2010                         | Conrad et al. 2012; Kumar et al. 2019; Modern Era-Retrospective Analysis for Research and Application (MERRA):<br><a href="https://gmao.gsfc.nasa.gov/reanalysis/MERRA/">https://gmao.gsfc.nasa.gov/reanalysis/MERRA/</a> |
| Soil map with of soil properties (detailed in section 2.2.2)                                    | Raster maps of 250 m resolution (Figure 5) and tabular point data on soil properties    | Year 1999                                                      | Uzgiplomeliyovodkhoz Institute 1999; Khorezm project database:<br><a href="https://www.zef.de/khorezm.html">https://www.zef.de/khorezm.html</a>                                                                           |
| Land use maps                                                                                   | Raster images of 250 m resolution and attribute tables with land-use classes (Figure 6) | Annual time step for the period 2000–2010                      | Conrad et al. 2016; Knöfel 2016                                                                                                                                                                                           |
| Afforestation maps/scenarios                                                                    | Raster maps of 250 m resolution (Figure 7)                                              | Year 2005 (average water availability) and 2008 (drought year) | Kumar et al. 2019                                                                                                                                                                                                         |
| Irrigation                                                                                      | Tabular data for hydro-module zones and crop types (Table 1)                            | Annual demands based on crop types (2000–2010)                 | Uzbekistan Science and Research Institute of Cotton Culture (UzNIIKh) 1992; Ministry of Agriculture and Water Resources of Uzbekistan (MAWR) 2001                                                                         |
